# Supplementary material
Source: Springer Nature journal article supplement (https://www.springermedizin.de/resource/supplementary/13049_2011_339_MOESM1_ESM.pdf/9666484)
Supplement: MOESM1 [file 9666484]

## Enrollment

Assessed for eligibility (n=60)

Excluded (n=0)

- ◆ Not meeting inclusion criteria (n=0)
- ◆ Declined to participate (n=0)
- ◆ Other reasons (n=0)

Randomized (n=60)

## Allocation

Allocated to feedback (n=30)

- ◆ Received allocated intervention (n=26)
- ◆ Did not receive allocated intervention (n=4, did not participate, reason unknown)

Allocated to non-feedback (n=30)

- ◆ Received allocated intervention (n=28)
- ◆ Did not receive allocated intervention (n=2, did not participate, reason unknown)

## Follow-Up

Lost to follow-up (n=0)

Discontinued intervention (n=0)

Lost to follow-up (n=0)

Discontinued intervention (n=0)

## Analysis

Analysed (n=26)

- ◆ Excluded from analysis (n=4, no data on participants)

Analysed (n=28)

- ◆ Excluded from analysis (n=2, no data on participants)
